# Supplementary material for: Statistical Analysis Reveals Co-Expression Patterns of Many Pairs of Genes in Yeast Are Jointly Regulated by Interacting Loci
Source: PubMed Central journal article supplement (PMC3610942; doi:10.1371/journal.pgen.1003414), 2013-03-28
Supplement: pgen.1003414.s009.pdf [file pgen.1003414.s009.pdf]

| Setting | $I(A = 1) I(B = 1)$ | $I(A = 1) I(B = 0)$ | $I(A = 0) I(B = 1)$ | $I(A = 0) I(B = 0)$ | Association type |
|---------|---------------------|---------------------|---------------------|---------------------|------------------|
| 1       | $\beta_0$           | $\beta_0$           | $\beta_0$           | $\beta_0$           | Independant      |
| 2       | $\beta_1$           | $\beta_0$           | $\beta_0$           | $\beta_0$           | Epistasis        |
| 3       | $\beta_0$           | $\beta_1$           | $\beta_0$           | $\beta_0$           | Epistasis        |
| 4       | $\beta_0$           | $\beta_0$           | $\beta_1$           | $\beta_0$           | Epistasis        |
| 5       | $\beta_0$           | $\beta_0$           | $\beta_0$           | $\beta_1$           | Epistasis        |
| 6       | $\beta_1$           | $\beta_1$           | $\beta_0$           | $\beta_0$           | Single           |
| 7       | $\beta_1$           | $\beta_0$           | $\beta_1$           | $\beta_0$           | Single           |
| 8       | $\beta_1$           | $\beta_0$           | $\beta_0$           | $\beta_1$           | Epistasis        |
| 9       | $\beta_1$           | $\beta_2$           | $\beta_0$           | $\beta_0$           | Epistasis        |
| 10      | $\beta_1$           | $\beta_0$           | $\beta_2$           | $\beta_0$           | Epistasis        |
| 11      | $\beta_1$           | $\beta_0$           | $\beta_0$           | $\beta_2$           | Epistasis        |
| 12      | $\beta_0$           | $\beta_1$           | $\beta_2$           | $\beta_0$           | Epistasis        |
| 13      | $\beta_0$           | $\beta_1$           | $\beta_0$           | $\beta_2$           | Epistasis        |
| 14      | $\beta_0$           | $\beta_0$           | $\beta_1$           | $\beta_2$           | Epistasis        |
| 15      | $\beta_0$           | $\beta_1$           | $\beta_2$           | $\beta_3$           | Epistasis        |

Table S1. Parameter settings.
