# Supplementary material for: Statistical Analysis Reveals Co-Expression Patterns of Many Pairs of Genes in Yeast Are Jointly Regulated by Interacting Loci
Source: PLoS Genet. 2013 Mar 28;9(3):e1003414. doi: 10.1371/journal.pgen.1003414 (PMC3610942; doi:10.1371/journal.pgen.1003414)
Supplement: Table S6 — Functional enrichment analysis for Epistasis-2D modules. (XLSX) [file pgen.1003414.s014.xlsx]

## Sheet: Supplementary Table 4
Instruction:
Module Genes: Genes in the Epistasis-2D module
Interval1: The chromosome interval 1 in Epistasis-2D module
Interval2: The chromosome interval 2 in Epistasis-2D module
Total1: The total number of genes in interval1
Total2: The total number of genes in interval2
Functional1: The number of genes which have annotation in the database in interval1
Functional2: The number of genes which have annotation in the database in interval2
Function: The funciton enriched in the intervals
Function Total: The number of genes noted to have such function in the database
Hit1: The number of genes have such function in interval1
Hit2: The number of genes have such function in interval2
p-value: The p-value for function enrichment
	Module Genes	Interval1	Interval2	Total1	Total2	Functional1	Functional2	Function	Function Total	Hit1	Hit2	p-value
Module 1	GOT1-ERV14	VII:833786-858604	I:187640-193251	14	2	12	2	ER/Golgi transport	88	1	1
Module 2	PTP2-GAB1	XII:370434-388933	III:240331-264124	8	13	7	11	osmosensory signaling	22	1	1
Glucose Modules	GPG1-(Rex4, Rnt1, UTP9)	XIV:558284-595885	XVI:387239-408883	16	8	10	7	*transcription	228	1	1
	TFS1-NOC3	XII:514835-516700	V:430931-458085	-- (cis)	11	-- (cis)	6			--	1
	GDB1-NOC3	IV:1149761-1185630	XIII:286122-298193	15	3	11	3	hexose transport	25	3	1
Ethanol Modules	UBP10-HMLALPHA1	XV:37207-44482	XII:370434-388933	2	8	1	7	**osmosensory signaling	22	1	1
	SPT23-RPD3	XII:849485-851826	IV:527445-555043	1	11	1	9	**osmosensory signaling	22	1	0
* : Although the general function of these candidates is transcription in GO database, the three candidates
MOT1, SSN8 and GLC7 are also functional in glucose response according to literatures.
**: Since the HOG pathway genes are only noted function in osmosensory signaling in GO database,
we use this term to calculate the p-value. As introduced in the results section, these HOG pathway
genes also function in oxidative stress response.
Oxidative phosphorylation Module
Intervals	Total #	Functional #	Function	Function Total	Hits	p-value
II: 133749-142262	5	4	Electron transport (oxidative phosphorylation)	68	1
VI: 205881-226146	10	10			1
X: 341703-372838	11	9			1
VIII: 193175-213595	14	12			1
X: 76840-111890	21	16			1
XV: 445656-461694	9	9			1
XII: 1006711-1023790	10	10			0
IV: 573400-720990	71	59			0
